# Supplementary material for: Optimization of irrigation on walnut through the IRRIFRAME water balance model
Source: Springer Nature journal article supplement (doi:10.1007/s00271-025-01006-z), 2025-02-27
Supplement: MOESM1 [file 271_2025_1006_MOESM1_ESM.docx]

Supplementary materials

Optimization of irrigation on walnut through the IRRIFRAME water balance model

Giulio Demetrio Perulli1, Elena Baldi1, Moreno Toselli1, Salvatore Luca Gentile2, Domenico Solimando2, Stefano Anconelli2, Alejandro Perez Pastor3, Alexandra Boini1, Luigi Manfrini1

1Departement of Agricultural and Food Sciences (DISTAL) – University of Bologna

2Consorzio di bonifica di II grado per il Canale Emiliano Romagnolo – CER

3Technical University of Cartagena


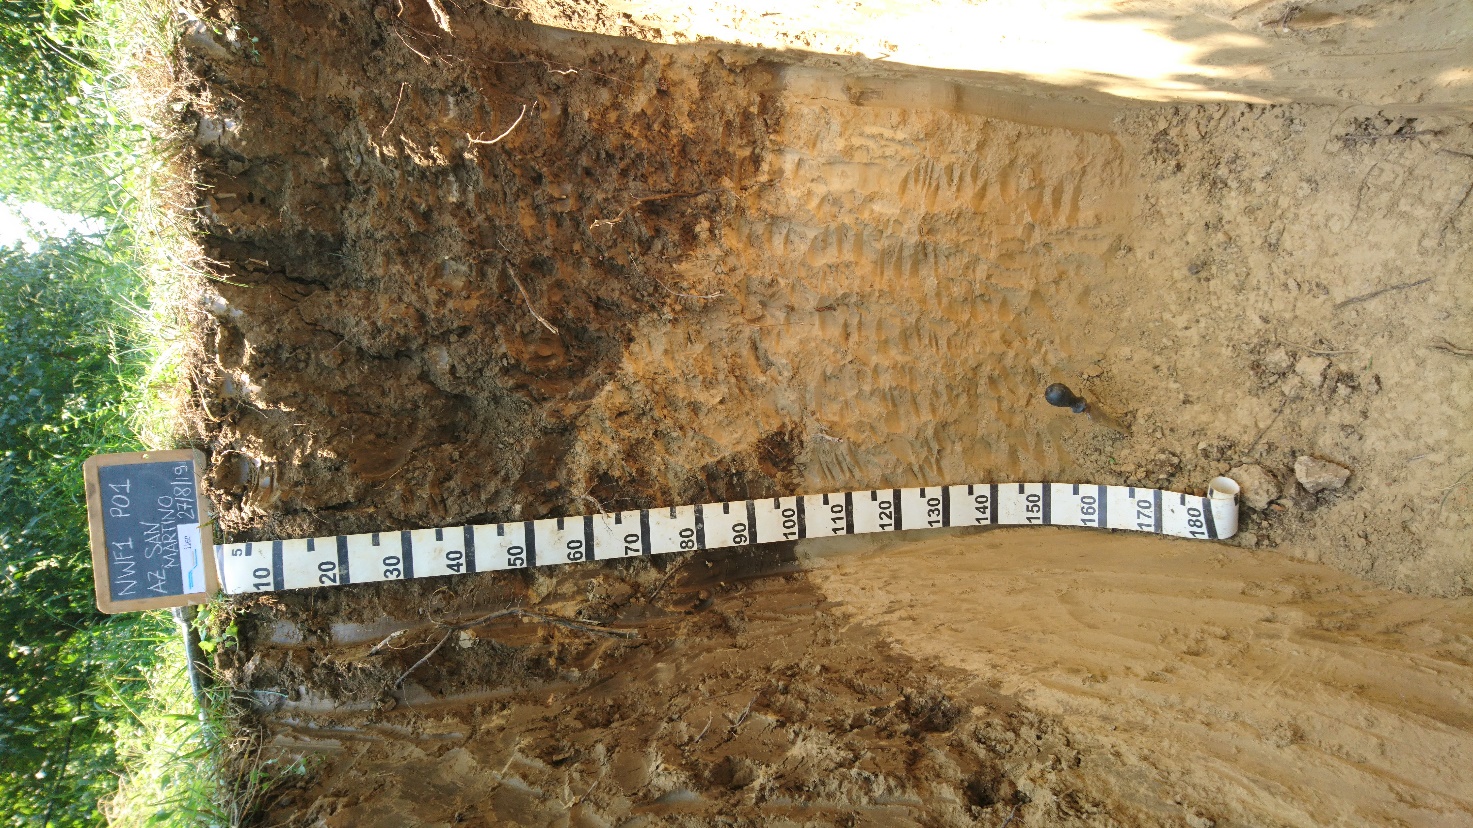


Figure S1. Soil profile in the middle of a walnut orchard row (27th August 2019). Roots are reaching 1m soil depth. Excavation and profile analysis was realized by I.TER (https://www.pedologia.net/).

*
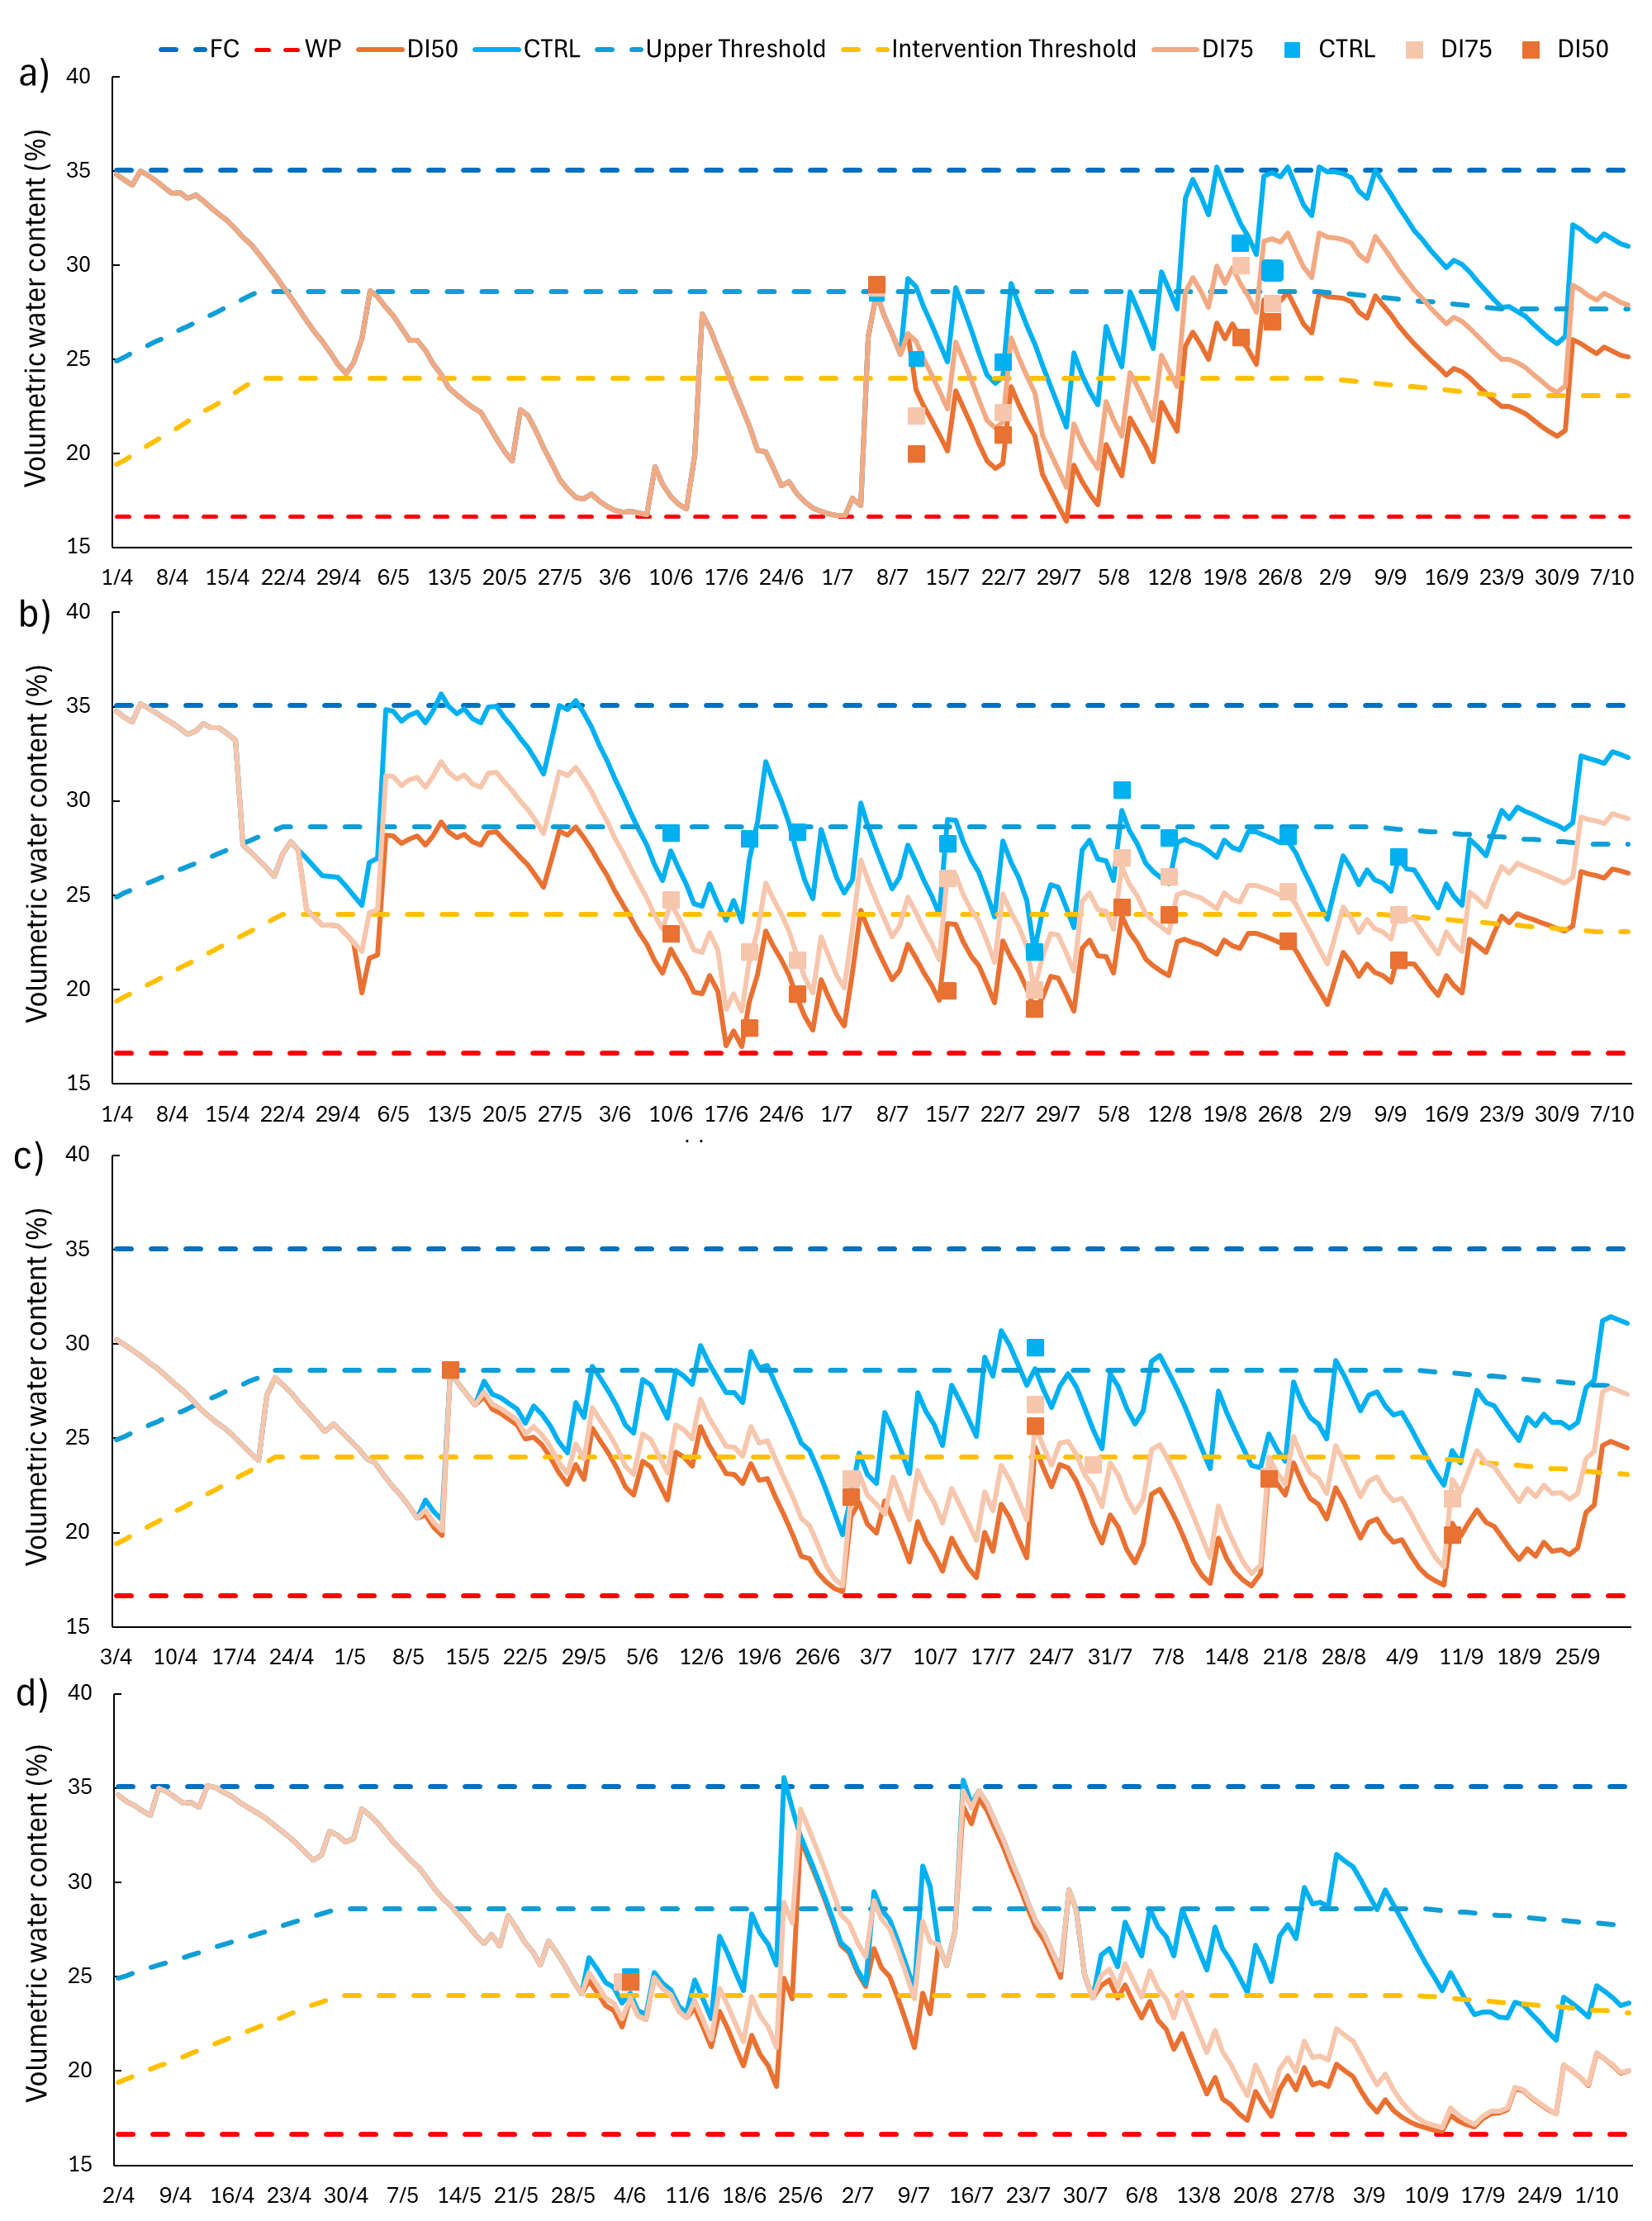
*

Figure S2. Estimated soil water content from the IRRIFRAME model in 2018 a); 2019 b); 2020 c); 2021 d). Continuous lines (orange, light-orange and light-blue) represent the estimated soil water content for each treatment. Squares (orange, light-orange and light-blue) are the real measured soil water content for each treatment. These punctiform soil moisture data measurements were utilized to perform an adjustment of the volumetric water content estimated by the IRRIFRAME model. Dashed lines (red, orange, blu and light-blue) represent respectively: Wilting Point (WP), Irrigation Intervention Threshold, Field Capacity (FC) and Upper Threshold.
